# Supplementary material
Source: Royal Society of Chemistry journal article supplement (doi:10.1039/d5cp03881b)

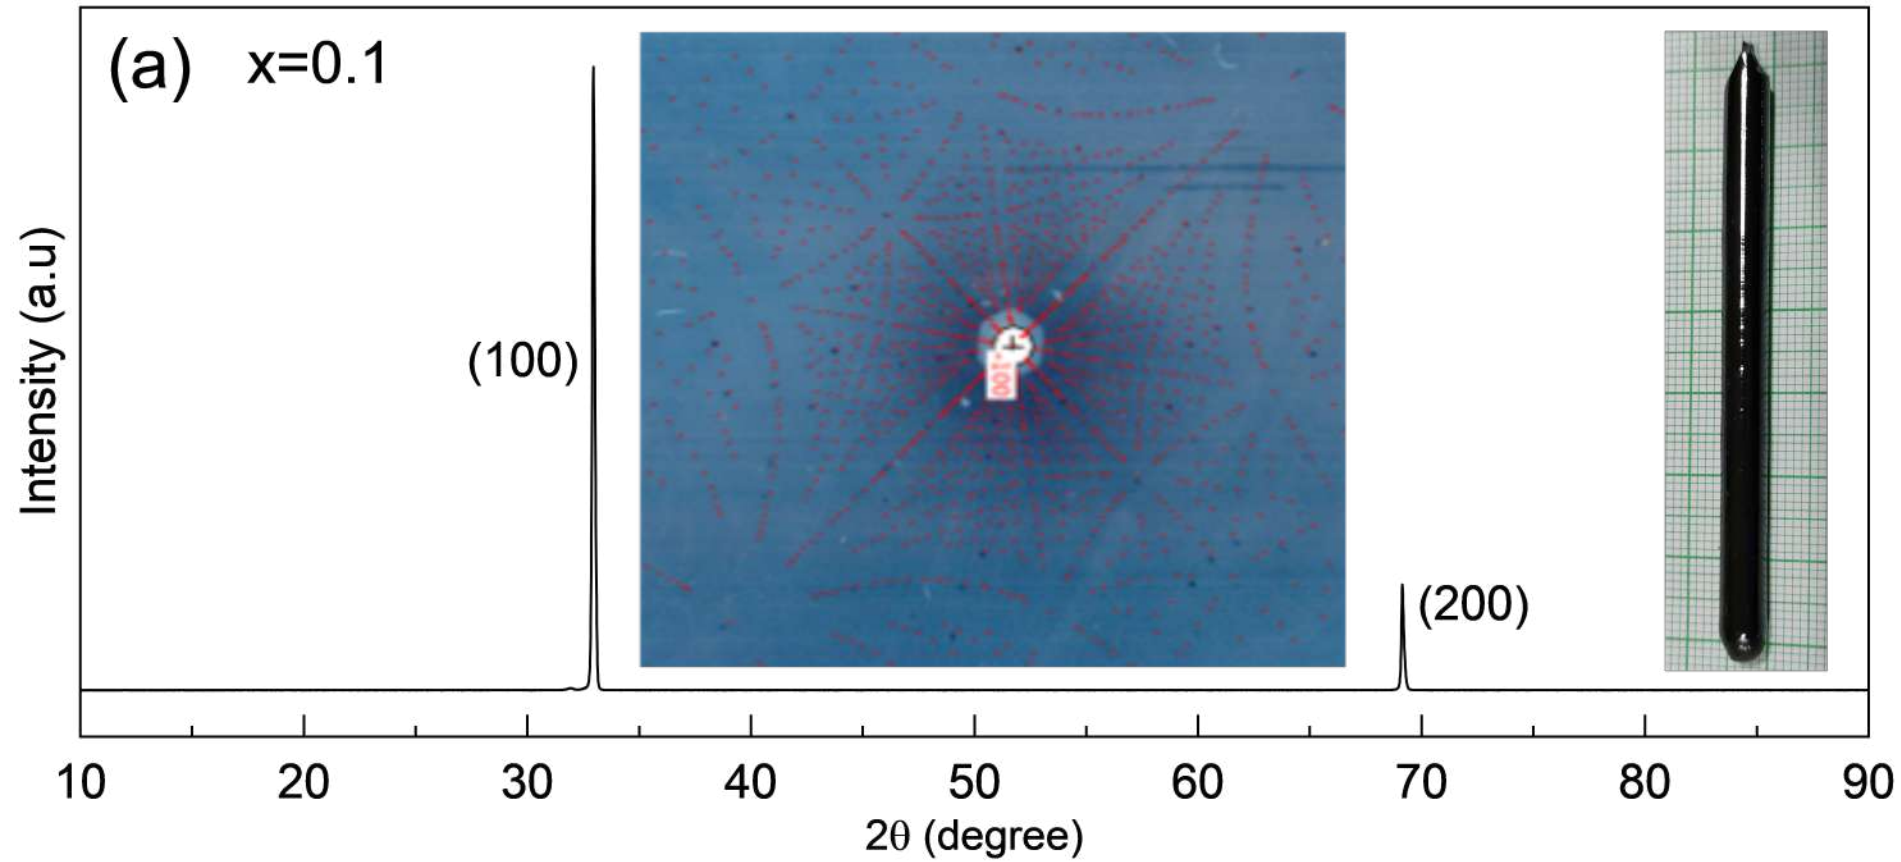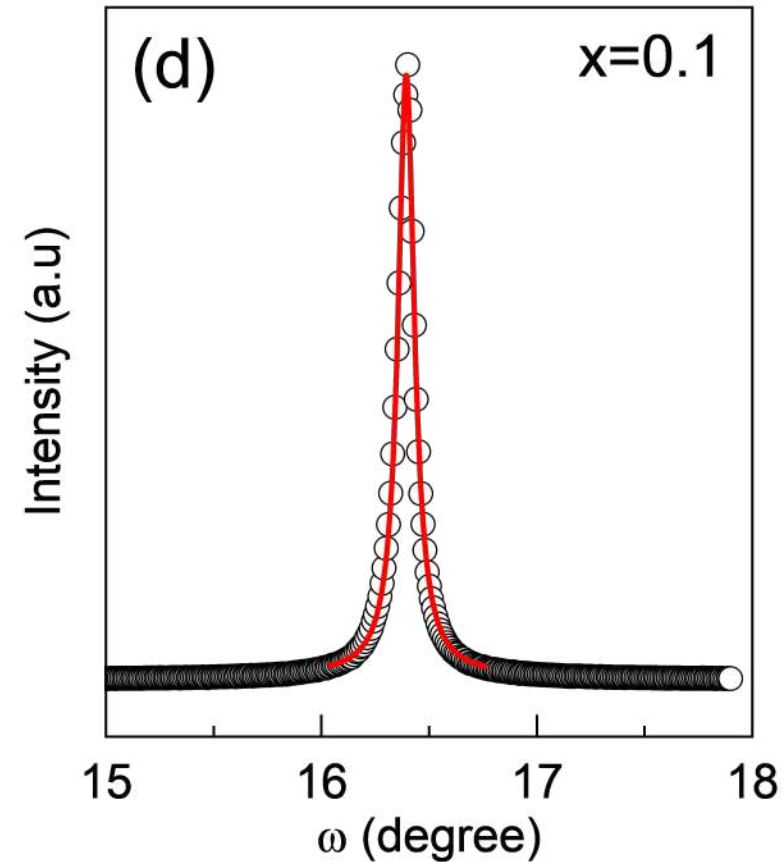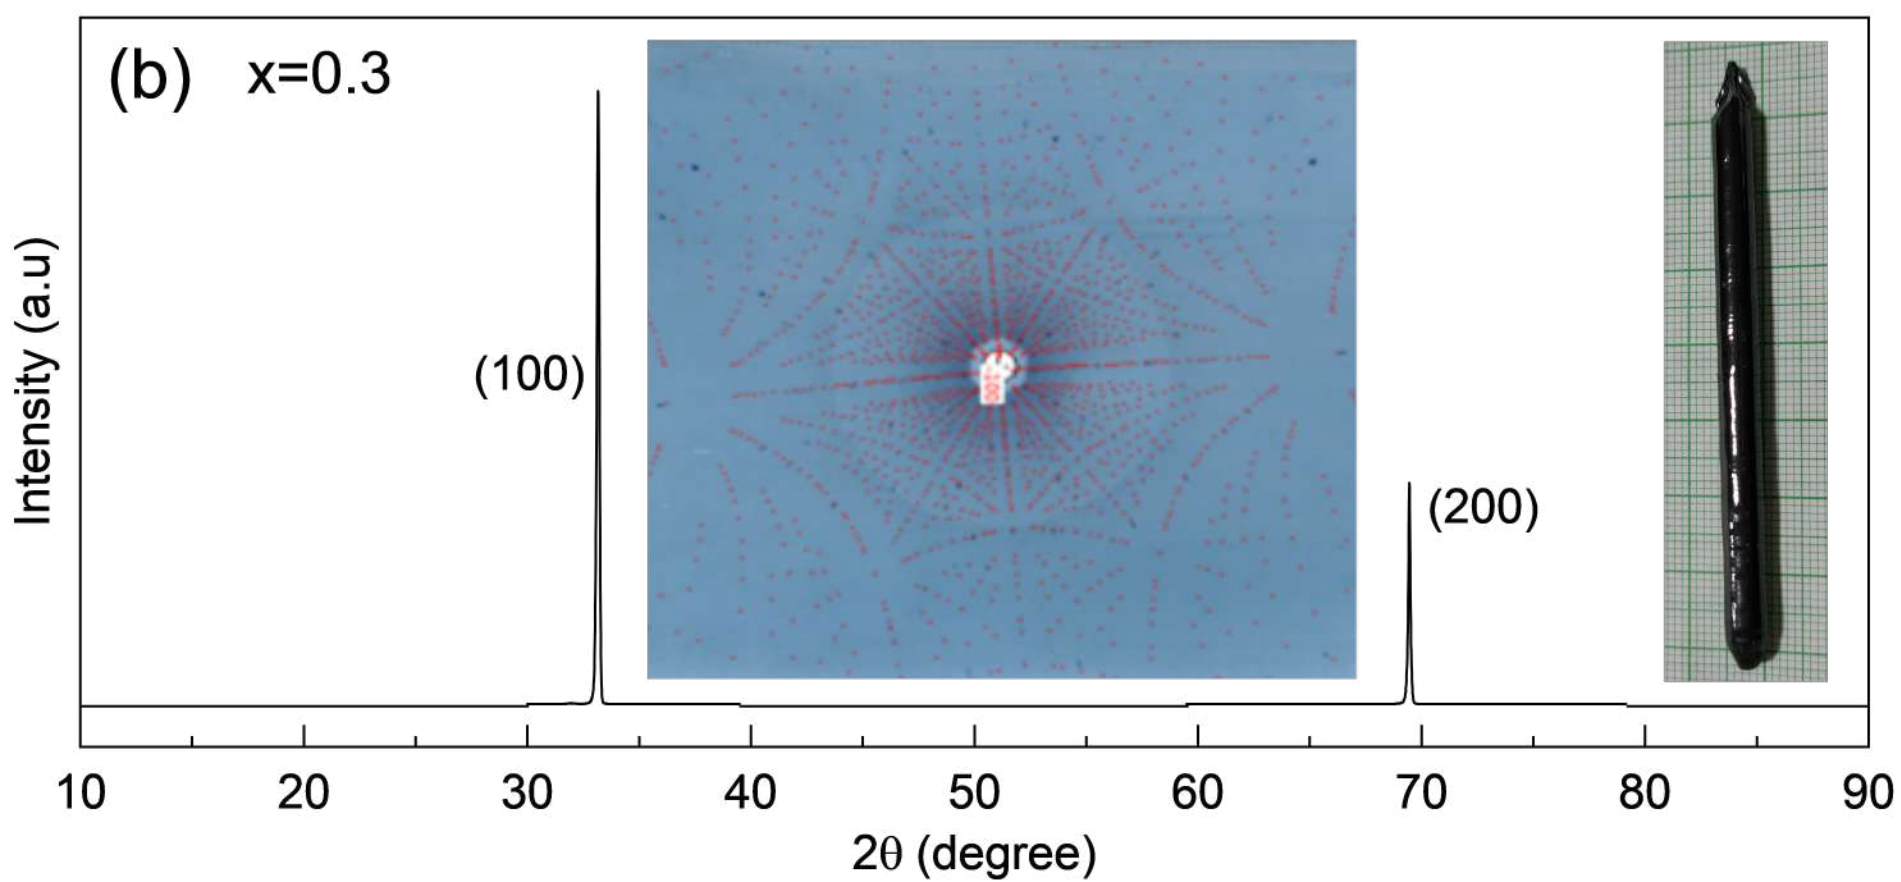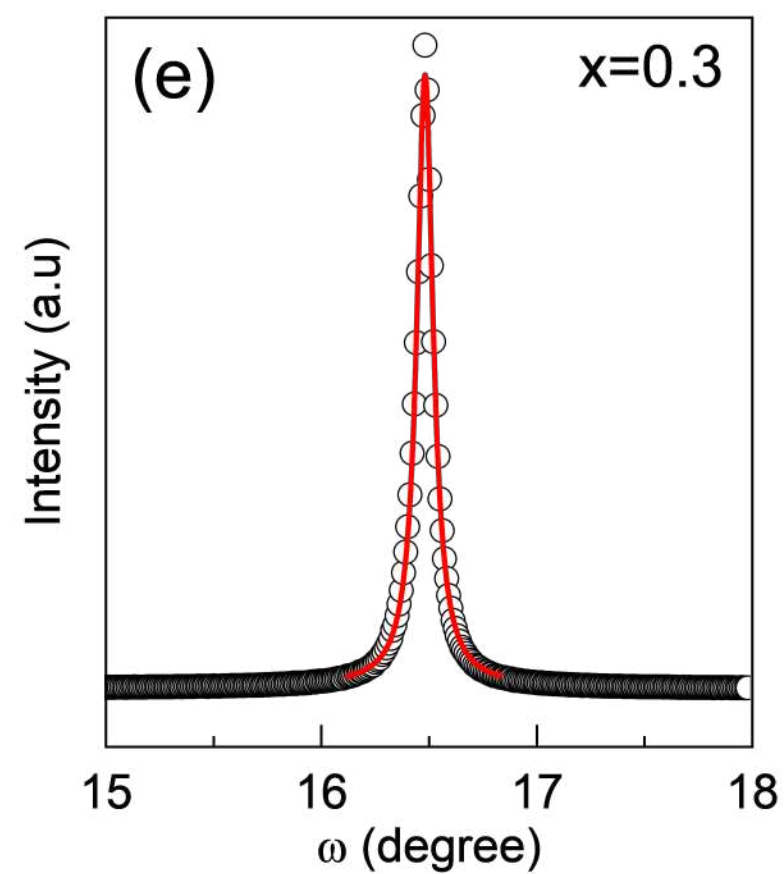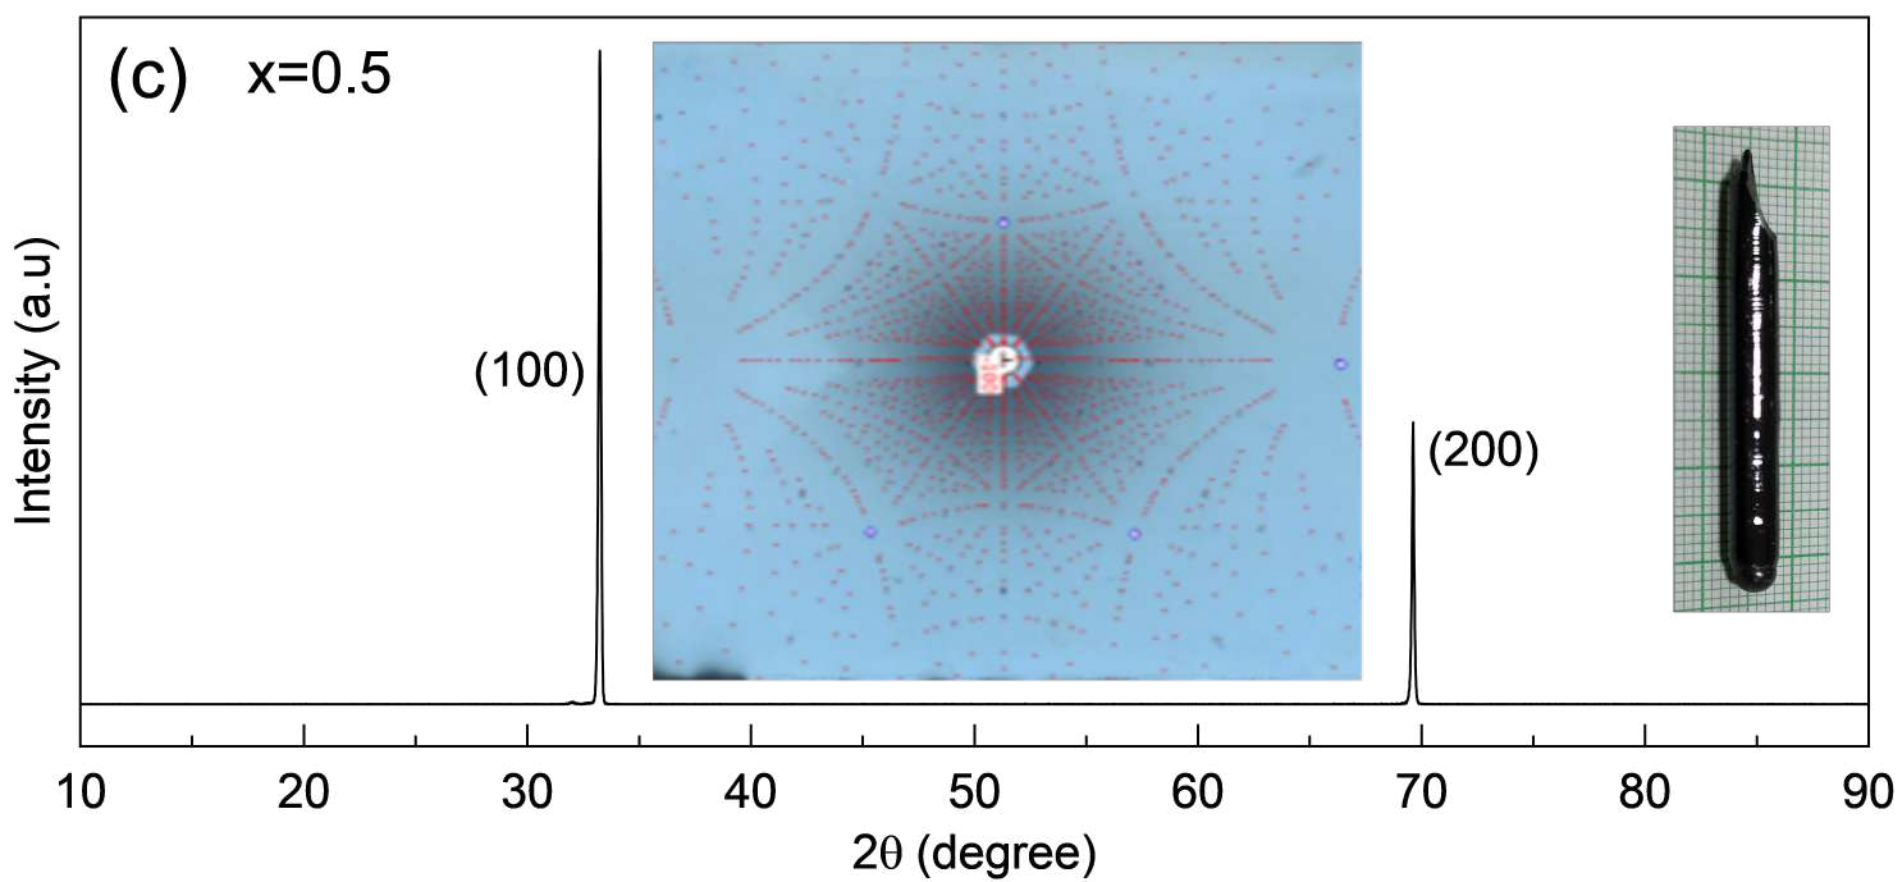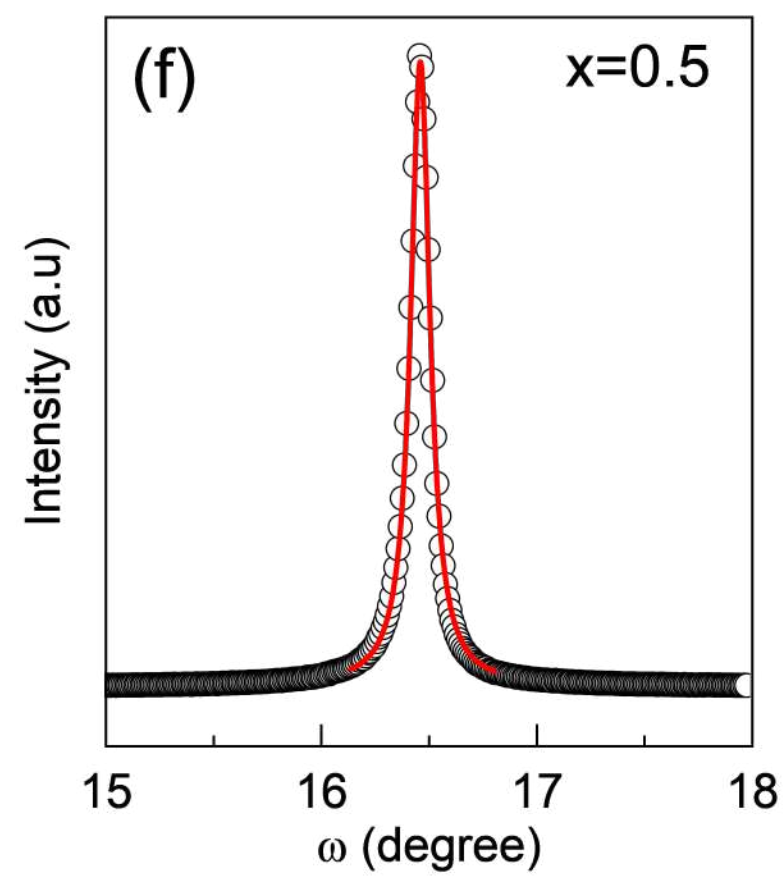

Supplement: d5cp03881b2.zip [file FigureS2.pdf › FigureS2.pdf]

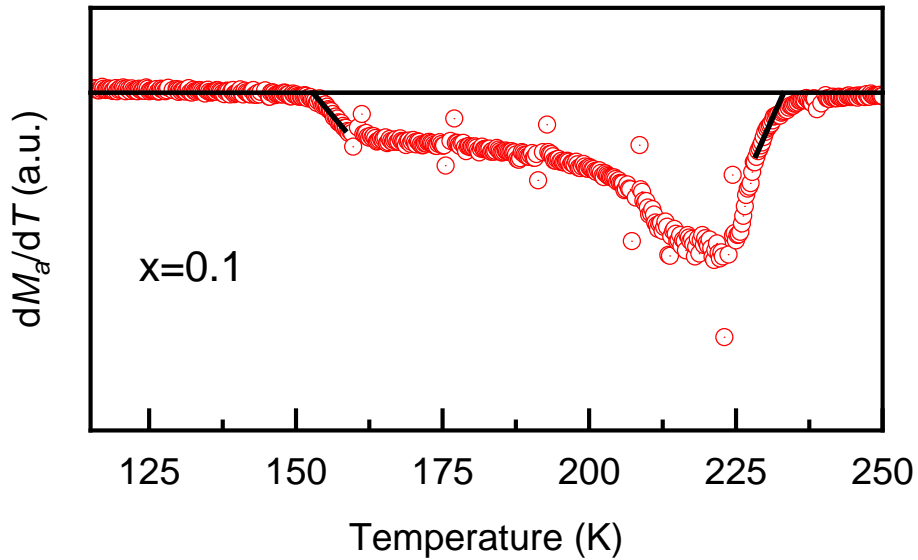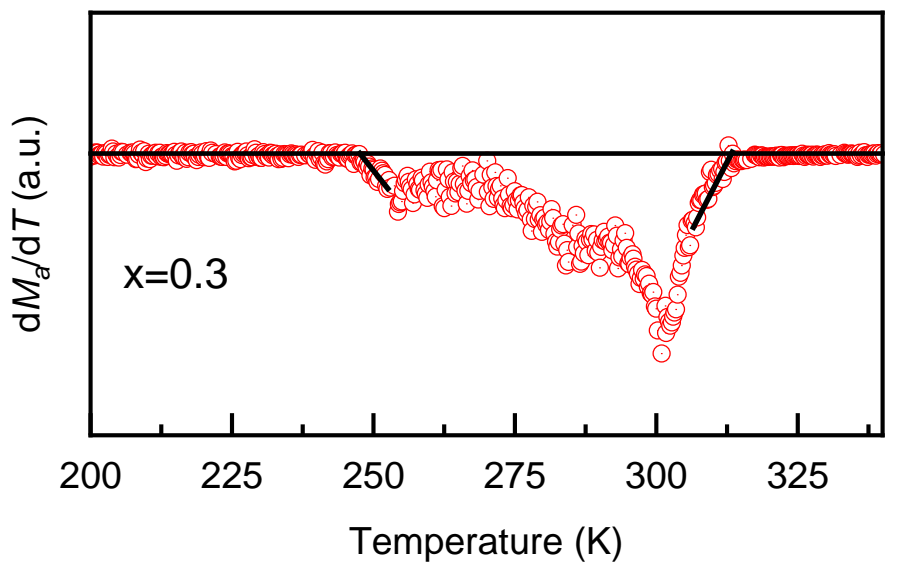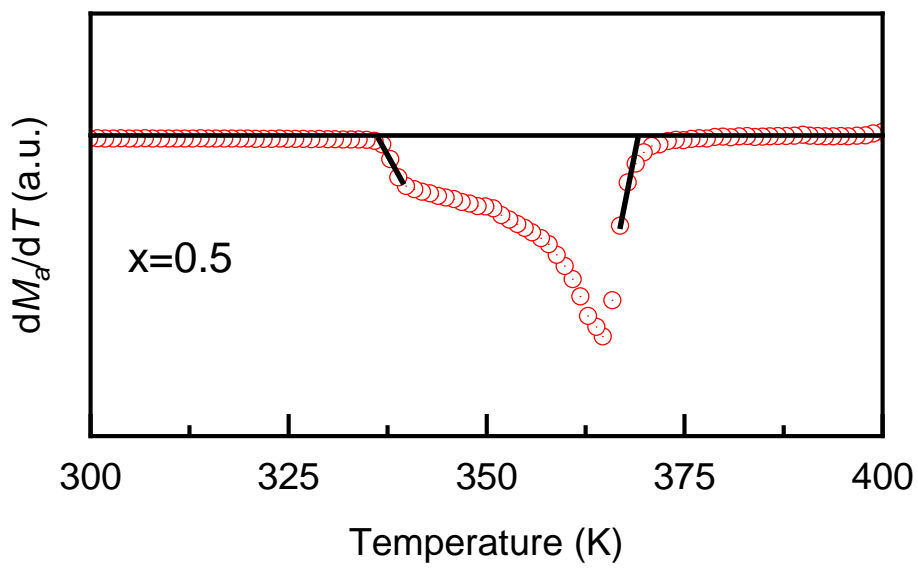

Supplement: d5cp03881b2.zip [file FigureS3.pdf › FigureS3.pdf]

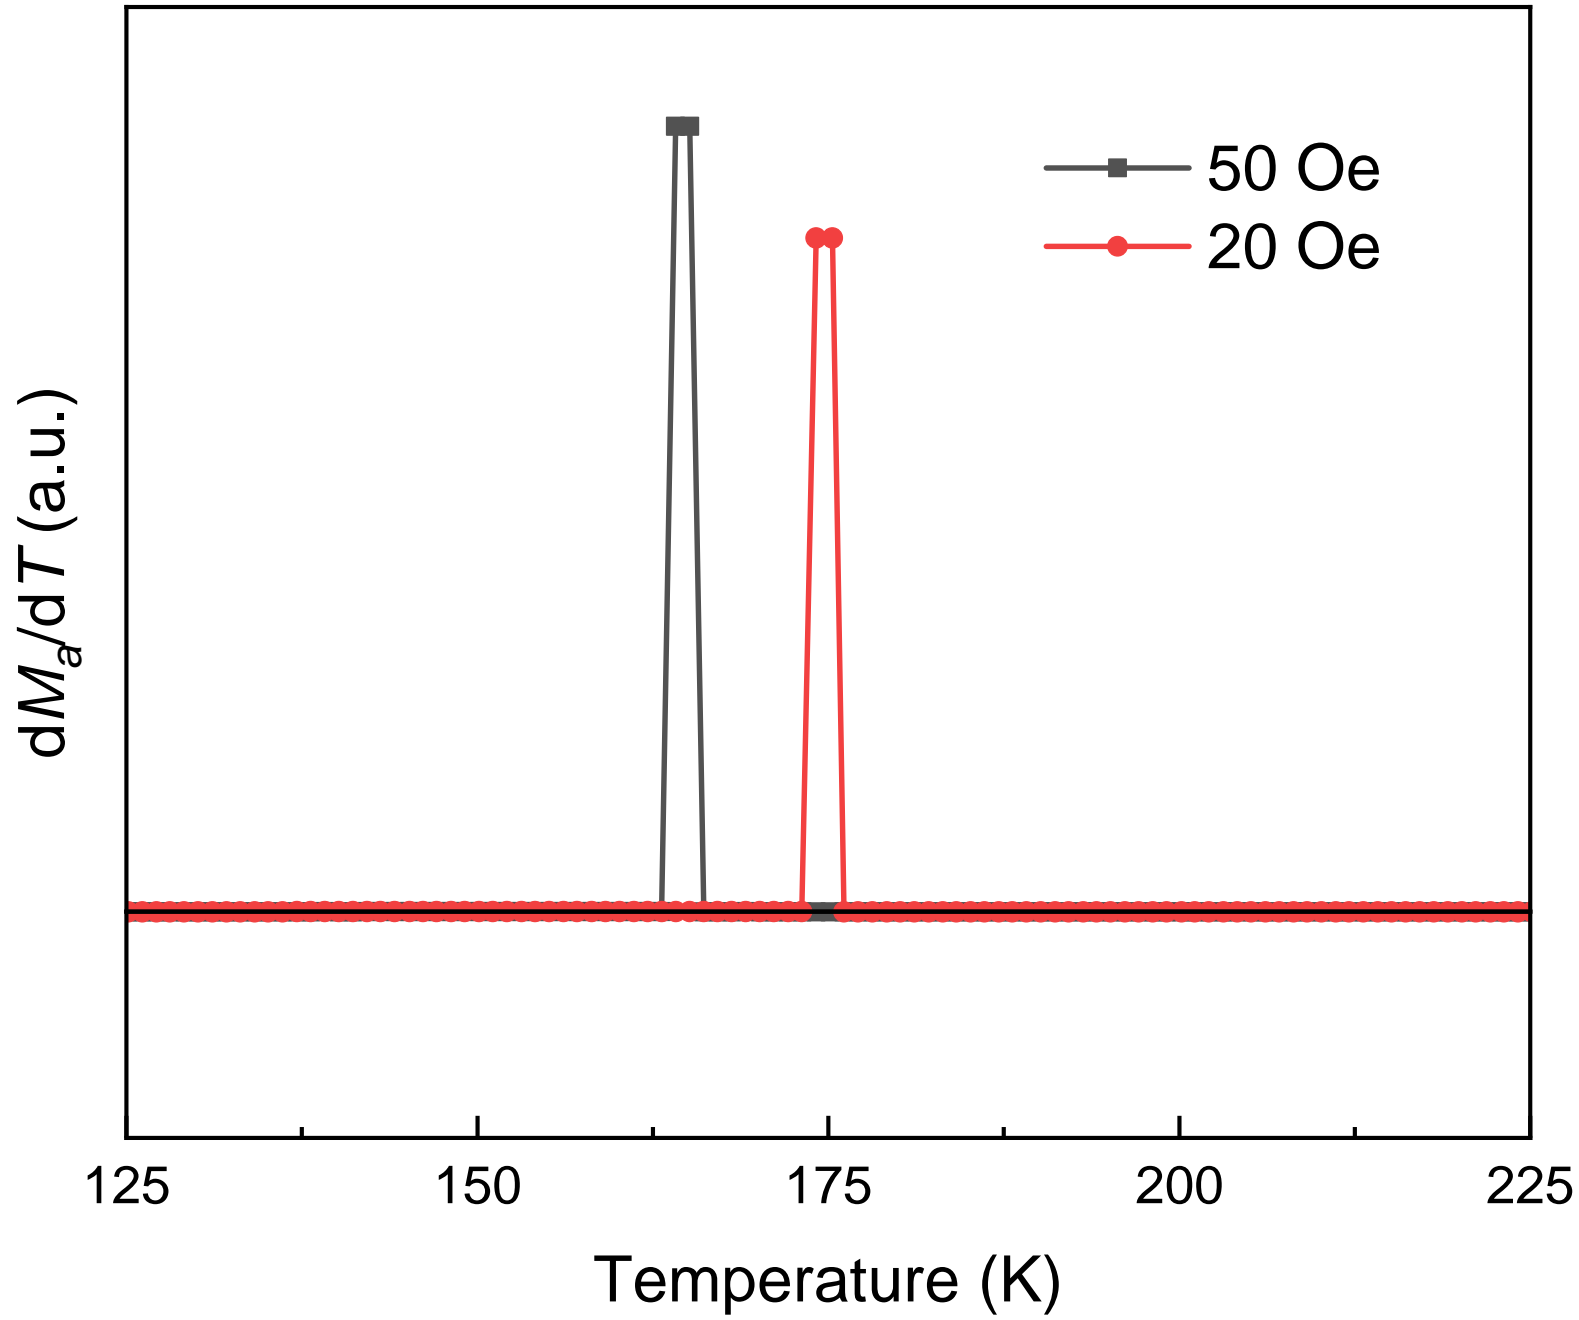

Supplement: d5cp03881b2.zip [file FigureS4.pdf › FigureS4.pdf]

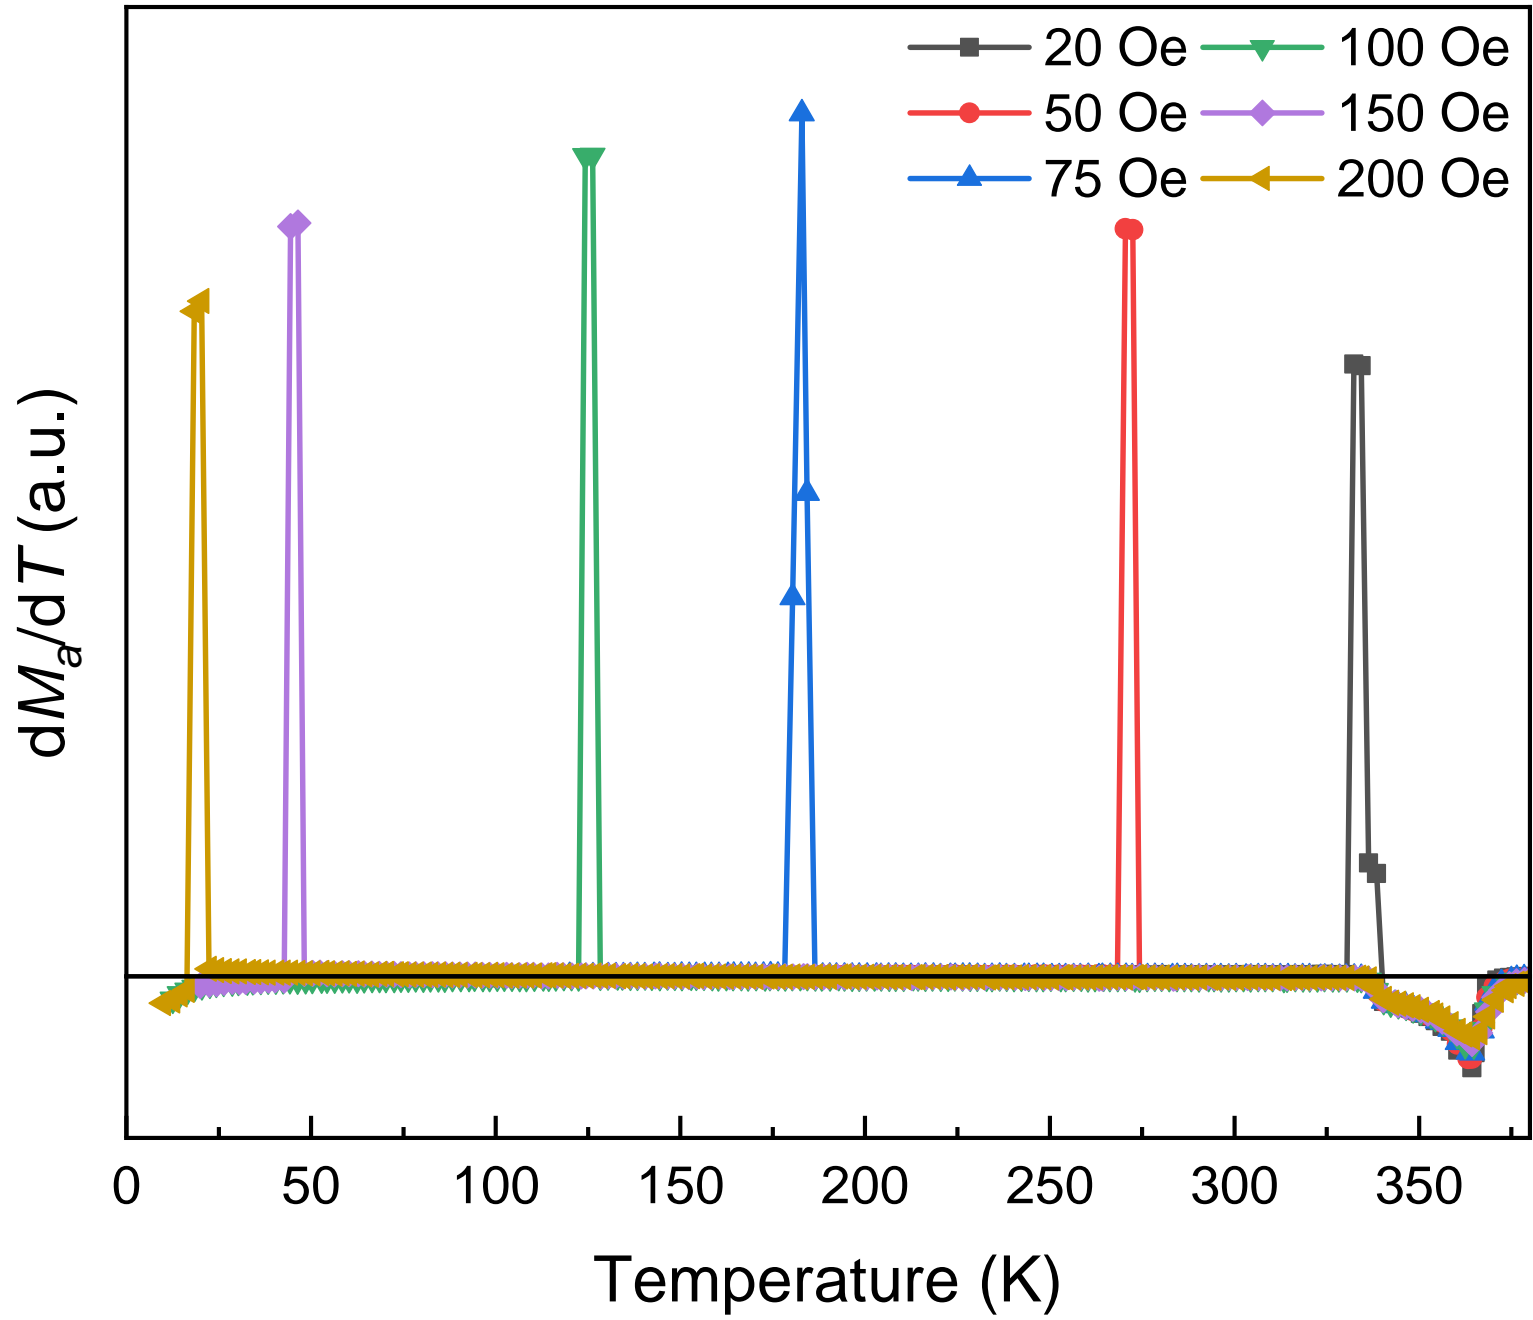

Supplement: d5cp03881b2.zip [file FigureS5.pdf › FigureS5.pdf]

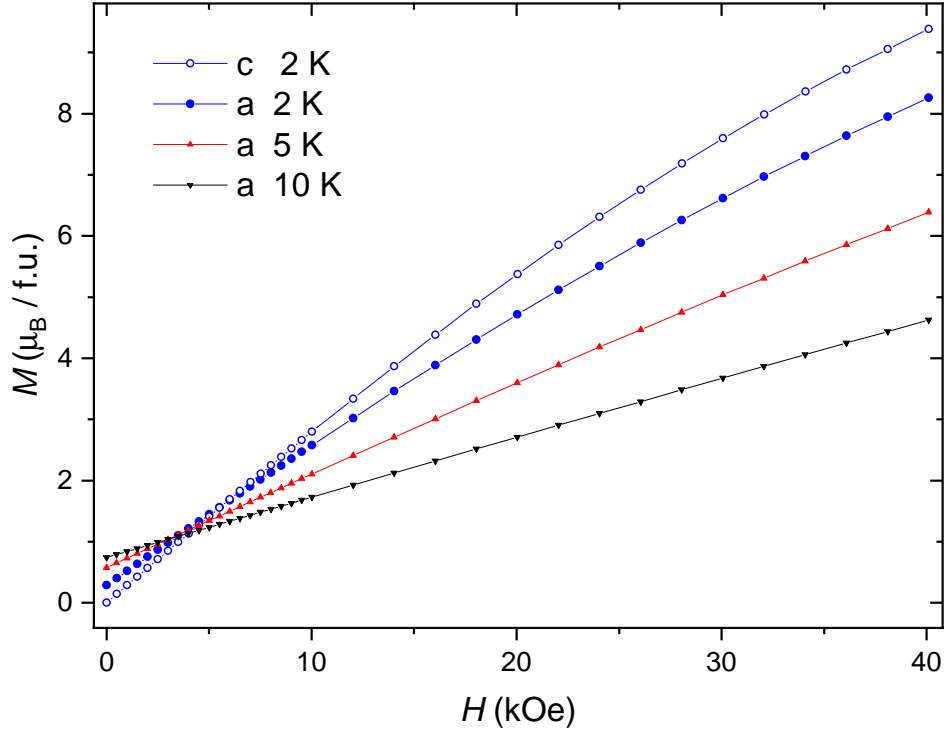

Supplement: d5cp03881b2.zip [file FigureS6.pdf › FigureS6.pdf]

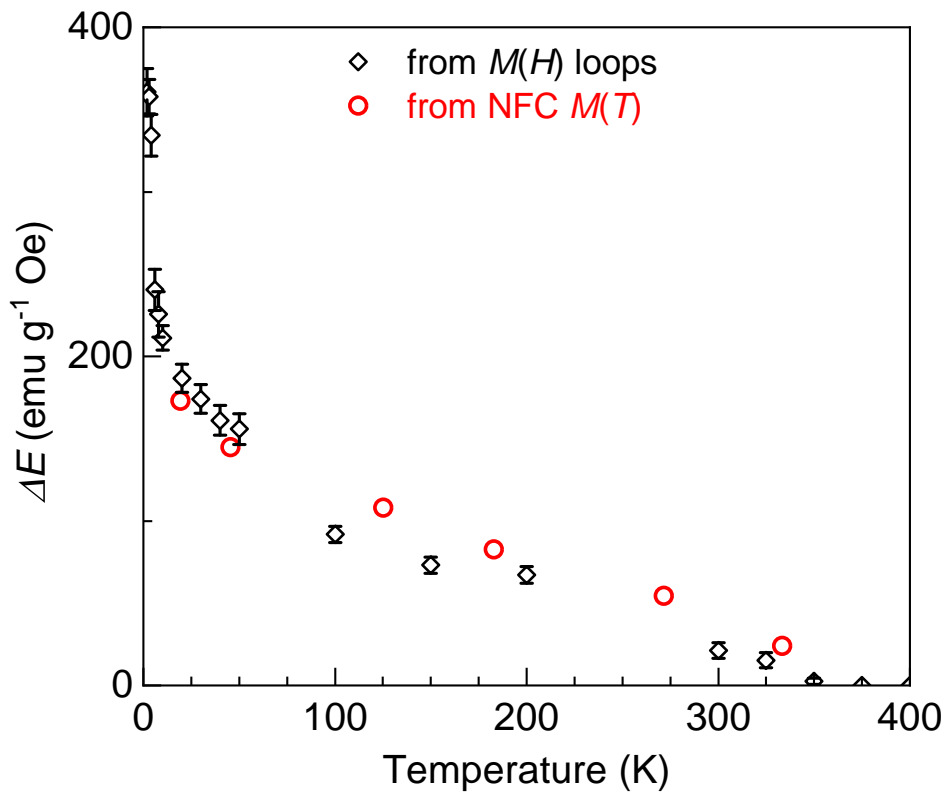

Supplement: d5cp03881b2.zip [file FigureS7.pdf › FigureS7.pdf]
